# Supplementary material for: Dual modulation sites for a reversible fluorescent probe for GSH over Cys/Hcy
Source: Royal Society of Chemistry journal article supplement (doi:10.1039/d1nj01490k), 2021-01-01

## Electronic Supplementary Information

### Dual modulation sites for reversible fluorescent probe for GSH over Cys/Hcy

Haixian Ren,<sup>a,b</sup> Fangjun Huo,<sup>c</sup> Caixia Yin<sup>a,b\*</sup>

<sup>a</sup> Department of Chemistry, Xinzhou Teachers University, Xinzhou 034000, China. Key

<sup>b</sup> Laboratory of Chemical Biology and Molecular Engineering of Ministry of Education, Institute of Molecular Science, Shanxi University, Taiyuan 030006, China

<sup>c</sup> Research Institute of Applied Chemistry, Shanxi University, Taiyuan 030006, China

\*Corresponding author: C.X. Yin, E-mail: [yincx@sxu.edu.cn](mailto:yincx@sxu.edu.cn), Tel/Fax: +86-351-7011022.

#### Contents:

#### I: Material and Methods

#### II: Synthesis

**Scheme S1:** The synthesis of **HBT-COU-N(Et)<sub>2</sub>**.

**Table S1:** The reported reversible probes for GSH.

**Figure S1:** <sup>1</sup>H MNR (600 MHz), <sup>13</sup>C MNR (150 MHz) and HR-MS spectrum of **HBT-COU-N(Et)<sub>2</sub>**.

**Figure S2:** UV-Vis spectra of **HBT-COU-N(Et)<sub>2</sub>** (10 μM) at the present of 1.5 mM Cys, Hcy and GSH.

**Figure S3:** Fluorescence intensity of **HBT-COU-N(Et)<sub>2</sub>** (10 μM) at the presence of 400 μM different analytes (GSH and inorganic ions: 1.5 mM) in HEPES/CH<sub>3</sub>CN system (7:3, pH=7.4), λ<sub>ex</sub> = 415 nm.

**Figure S4:** The HR-MS of the **HBT-COU-N(Et)<sub>2</sub>-GSH** system.

**Figure S5:** Cell viability estimated by MTT-8 assay with HL-7702 cells, which were cultured in the presence of 5-50.0  $\mu\text{M}$  **HBT-COU-N(Et)<sub>2</sub>** for 5 h and 10 h.

## I: Material and Methods

### *Materials and Physical measurements*

All the reagents and solvents were commercially available. Naphthalene-1,6-diol and ethyl acetoacetate were got from Aladdin Industrial Corporation (Shanghai, China). Amino acids were got from Shanghai Experiment Reagent Co., Ltd (Shanghai, China). Fluorescence spectra were recorded by HITACHI F-7000 fluorescence spectrophotometer. Ultraviolet-visible spectra were detected by Hitachi U-3900 UV spectrophotometer. <sup>1</sup>H NMR and <sup>13</sup>C NMR data were obtained by Bruker AVANCE-600 MHz NMR spectrometers (Bruker, Billerica, MA). HR-MS determinations were implemented on an AB SCIEX Tripple TOF5600 Instruments. The cell imaging experiments were measured by Zeiss LSM880 Airyscan confocal laser scanning microscope.

## II: Synthesis

Compounds 1 was synthesized with reference to literature<sup>1</sup>. Compounds 1 and 2 were refluxed in ethanol under the catalysis of triethylamine to obtain **HBT-COU-N(Et)<sub>2</sub>** (**Scheme S1**), which was confirmed by NMR and HR-MS. (**Figure S1**)

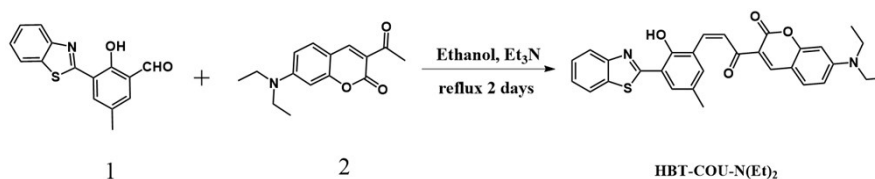

**Scheme S1** the synthesis of **HBT-COU-N(Et)<sub>2</sub>**

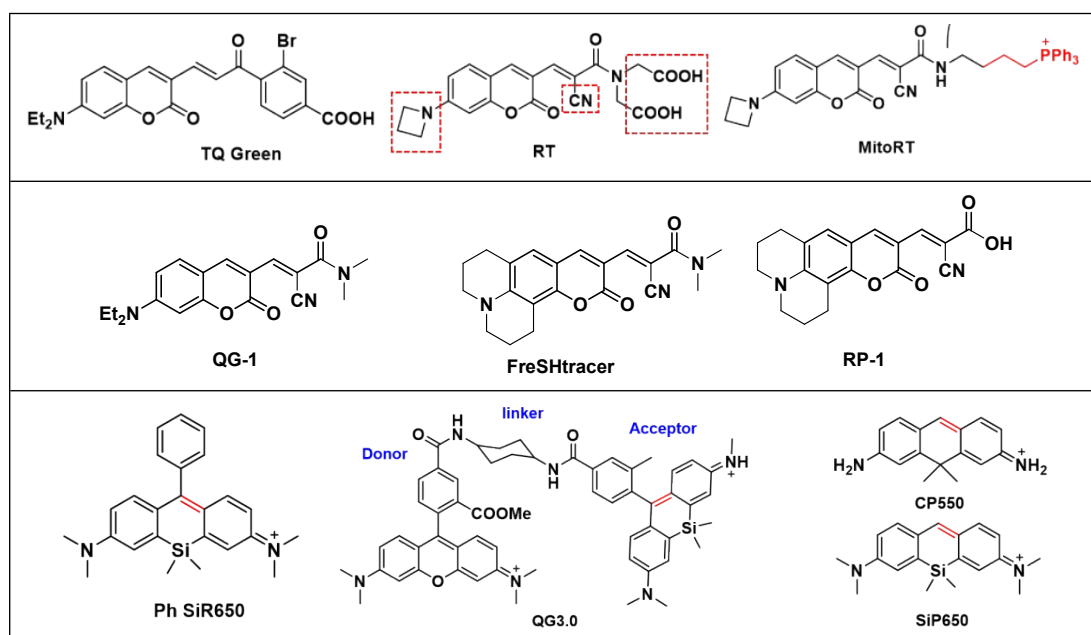

**Table S1**

\* The relative refs were shown below.

- Jiang, X.; Chen, J.; Bajić, A.; Zhang, C.; Song X.; Carroll, S. L.; Cai, Z. L.; Tang, M.; Xue, M.; Cheng, N.; Schaaf, C. P.; Li, F.; MacKenzie, K. R.; Ferreon, A.; Xia, F.; Wang, M. C.; Maletić-Savatić, M.; Wang, J. *Nat. Commun.* 2017, 8, 16087-16098.
- Jiang, X.; Yu, Y.; Chen, J.; Zhao, M.; Chen, H.; Song, X.; Matzuk, A.; Carroll, J.; Tan, X.; Sizovs, A.; Cheng, N.; Wang, M. C.; Wang, J. *ACS. Chem. Bio.* 2015, 10 (3), 864-874.
- Liu, Z.; Zhou, X.; Miao, Y.; Hu, Y.; Kwon, N.; Wu, X.; Yoon, J. *Angew. Chem., Int. Ed.* 2017, 56, 5812-5816.
- Jeong, E. M.; Yoon, J. H.; Lim, J.; Shin, J. W.; Cho, A. Y.; Heo, J.; Lee, K. B.; Lee, J. H.; Lee, W. J.; Kim, H. J.; Son, Y. H.; Lee, S. J.; Cho, S. Y.; Shin, D. M.; Choi, K.; Kim, I. G. *Stem Cell Rep.* 2018, 10, 600-614.
- Tian, M.; Yang, M.; Liu, Y.; Jiang, F. L. *ACS Appl. Bio Mater.* 2019, 2, 4503-4514.
- Umezawa, K.; Yoshida, M.; Kamiya, M.; Yamasoba, T.; Urano, Y. *Nat. Chem.* 2017, 9, 279-286.
- Morozumi, A.; Kamiya, M.; Uno, S.; Umezawa, K.; Kojima, R.; Yoshihara, T.; Tobita, S.; Urano, Y. *J. Am. Chem. Soc.* 2020, 142, 9625-9633.



Figure S1

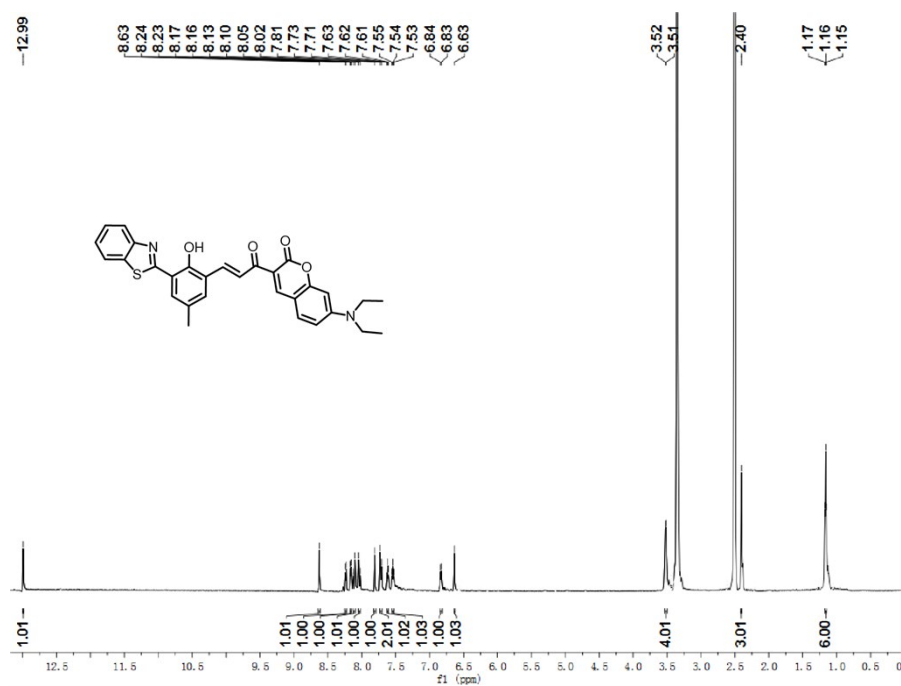

<sup>1</sup>H-NMR of the probe HBT-COU-N(Et)<sub>2</sub>

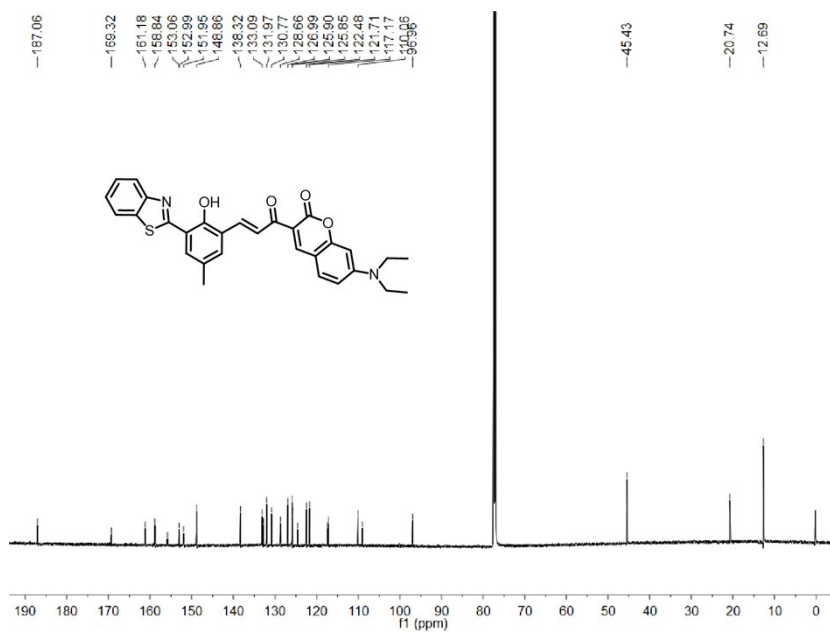

<sup>13</sup>C-NMR of the probe HBT-COU-N(Et)<sub>2</sub>

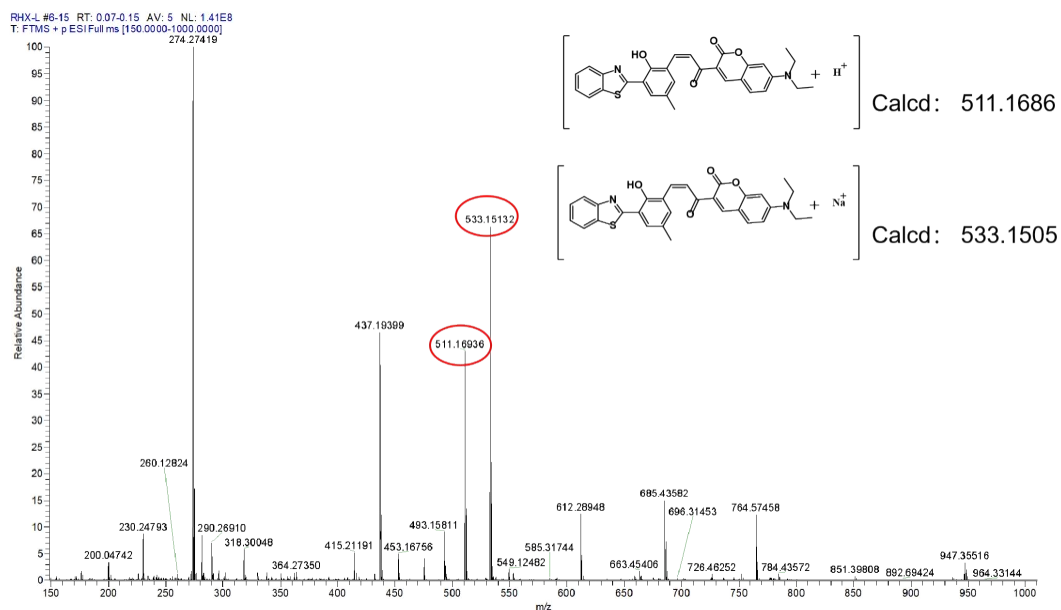

HR-MS of the probe **HBT-COU-N(Et)<sub>2</sub>**

Figure S2:

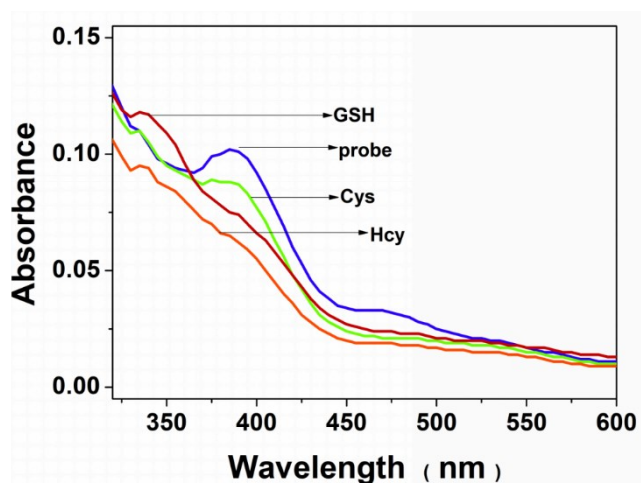

Figure S3

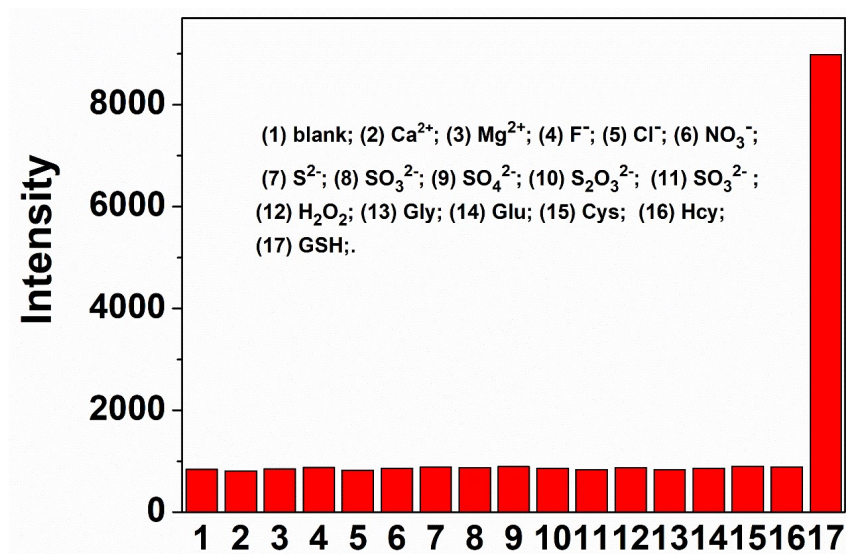

Supplement: d1nj01490k1.pdf [file d1nj01490k1.pdf]
